# Supplementary material for: Genome Sequencing and Analysis of Thraustochytriidae sp. SZU445 Provides Novel Insights into the Polyunsaturated Fatty Acid Biosynthesis Pathway
Source: PubMed Central journal article supplement (PMC7073664; doi:10.3390/md18020118), 2020-02-18
Supplement: marinedrugs-18-00118-s001.pdf [file marinedrugs-18-00118-s001.pdf]

## Supplementary Material

### The default parameters of Infranal software:

Usage: cmsearch [options] <cmfile> <seqdb>

#### Basic options:

- h : show brief help on version and usage
- g : configure CM for glocal alignment [default: local]
- Z <x> : set search space size in \*Mb\* to <x> for E-value calculations (x>0)
- devhelp : show list of otherwise hidden developer/expert options

#### Options directing output:

- o <f> : direct output to file <f>, not stdout
- A <f> : save multiple alignment of all significant hits to file <s>
- tblout <f> : save parseable table of hits to file <s>
- acc : prefer accessions over names in output
- noali : don't output alignments, so output is smaller
- notextw : unlimit ASCII text output line width
- textw <n> : set max width of ASCII text output lines [120] (n>=120)
- verbose : report extra information; mainly useful for debugging

#### Options controlling reporting thresholds:

- E <x> : report sequences <= this E-value threshold in output [10.0] (x>0)
- T <x> : report sequences >= this score threshold in output

#### Options controlling inclusion (significance) thresholds:

- incE <x> : consider sequences <= this E-value threshold as significant [0.01]

--incT <x> : consider sequences  $\geq$  this score threshold as significant

Options controlling model-specific reporting thresholds:

--cut\_ga : use CM's GA gathering cutoffs as reporting thresholds

--cut\_nc : use CM's NC noise cutoffs as reporting thresholds

--cut\_tc : use CM's TC trusted cutoffs as reporting thresholds

Options controlling acceleration heuristics\*:

--max : turn all heuristic filters off (slow)

--nohmm : skip all HMM filter stages, use only CM (slow)

--mid : skip first two HMM filter stages (SSV & Vit)

--default : default: run search to search for RNA sequences in genomic data, sRNA, miRNA and snRNA was predicted in compared with Rfam database (Version: 9.1, parameter settings: - p blastn - W 7 - e 1 - v 10000 - b 10000 - m 8 - i subfile - o \*.blast.m8
